# Supplementary material for: High thermal conductivity and high impact strength of epoxy nanodielectrics with functionalized halloysite nanotubes
Source: Royal Society of Chemistry journal article supplement (doi:10.1039/c6ra06717d), 2016-01-01
Supplement: c6ra06717d1.pdf [file c6ra06717d1.pdf]

## Electronic Supplementary Information

### High Thermal Conductivity and High Impact Strength of Epoxy Nanodielectrics with Functionalized Halloysite Nanotubes

Hailin Mo<sup>a</sup>, KeYang<sup>a</sup>, Shengtao Li<sup>b</sup> and Pingkai Jiang<sup>\*a</sup>

<sup>a</sup>Department of Polymer Science and Engineering and Shanghai Key Lab of Electrical Insulation and Thermal Aging, Shanghai Jiao tong University, 200240 Shanghai, China. E-mail: pkjiang@sjtu.edu.cn; Tel 86-021-54746520

<sup>b</sup>State Key Lab of electrical Insulation and Power Equipment, Xi'an Jiaotong University, Xi'an, China

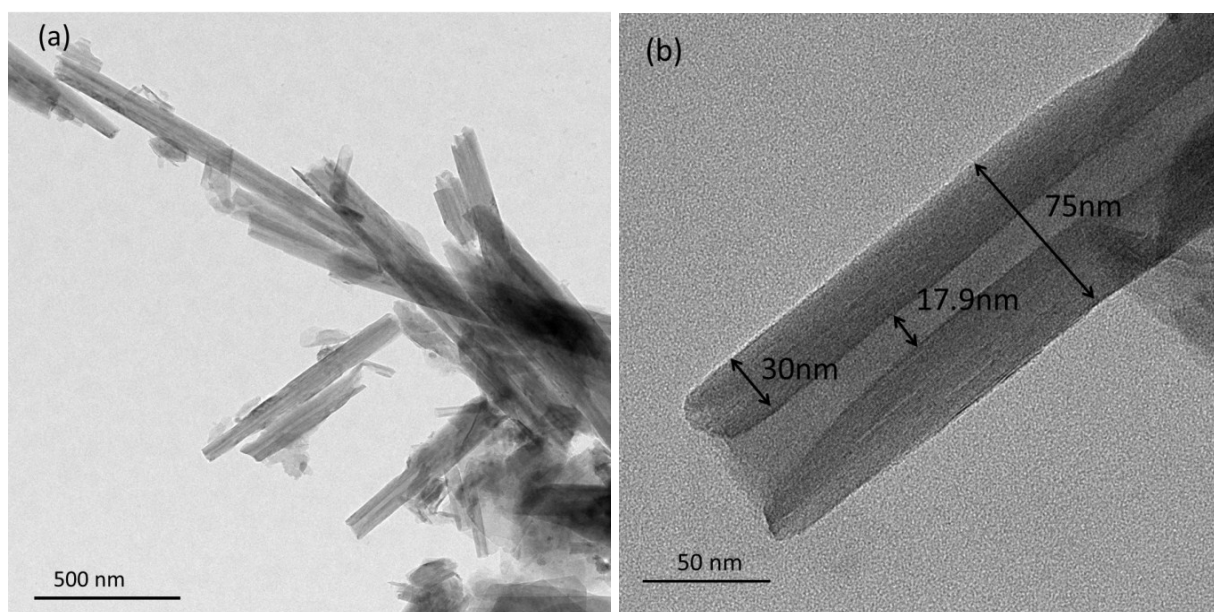

Fig. S1 TEM images of (a) HNTs; (b) hollow tubular appearance of individual HNTs.

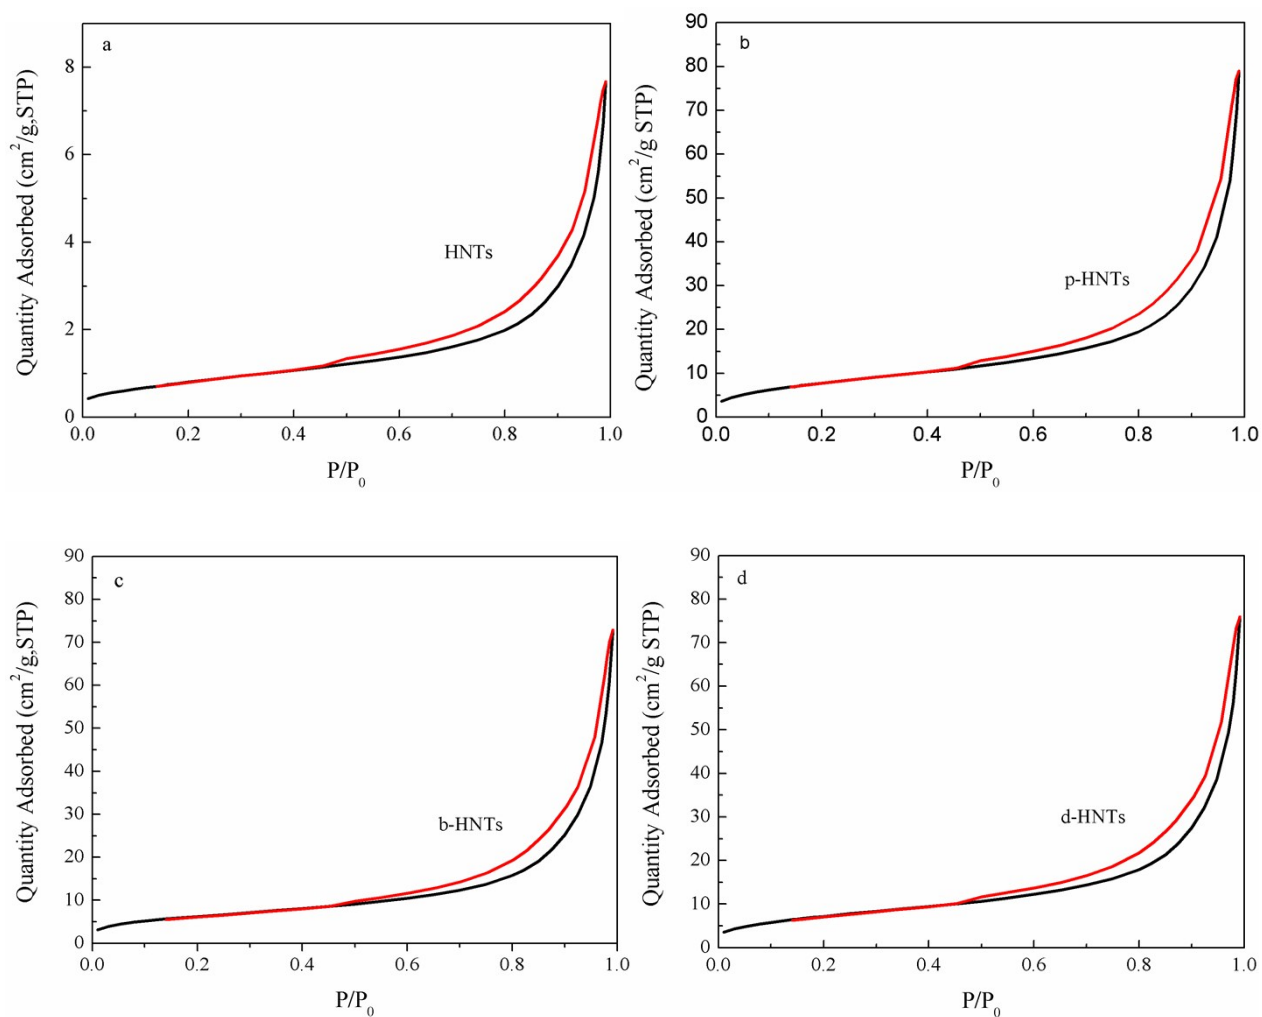

Fig. S2 Nitrogen adsorption-desorption isotherms of HNTs and in-situ grafted HNTs.

The curves of the HNTs and in-situ grafted HNTs were in agreement with the type IV isotherms with hysteresis loops, it was the characteristic of the mesoporous materials.<sup>1</sup> The t-plot curves became convex to the abscissa over a short range of t-values, in which capillary condensation occurred during the adsorption process.

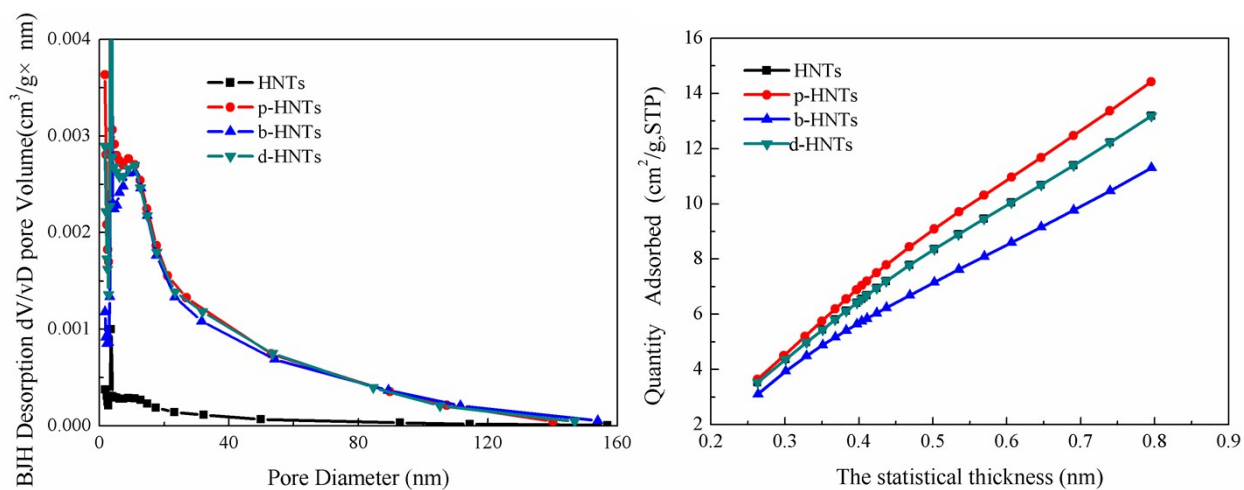

Fig. S3 Pore-size distribution and t-plot curves of HNTs and in-situ grafted HNTs.

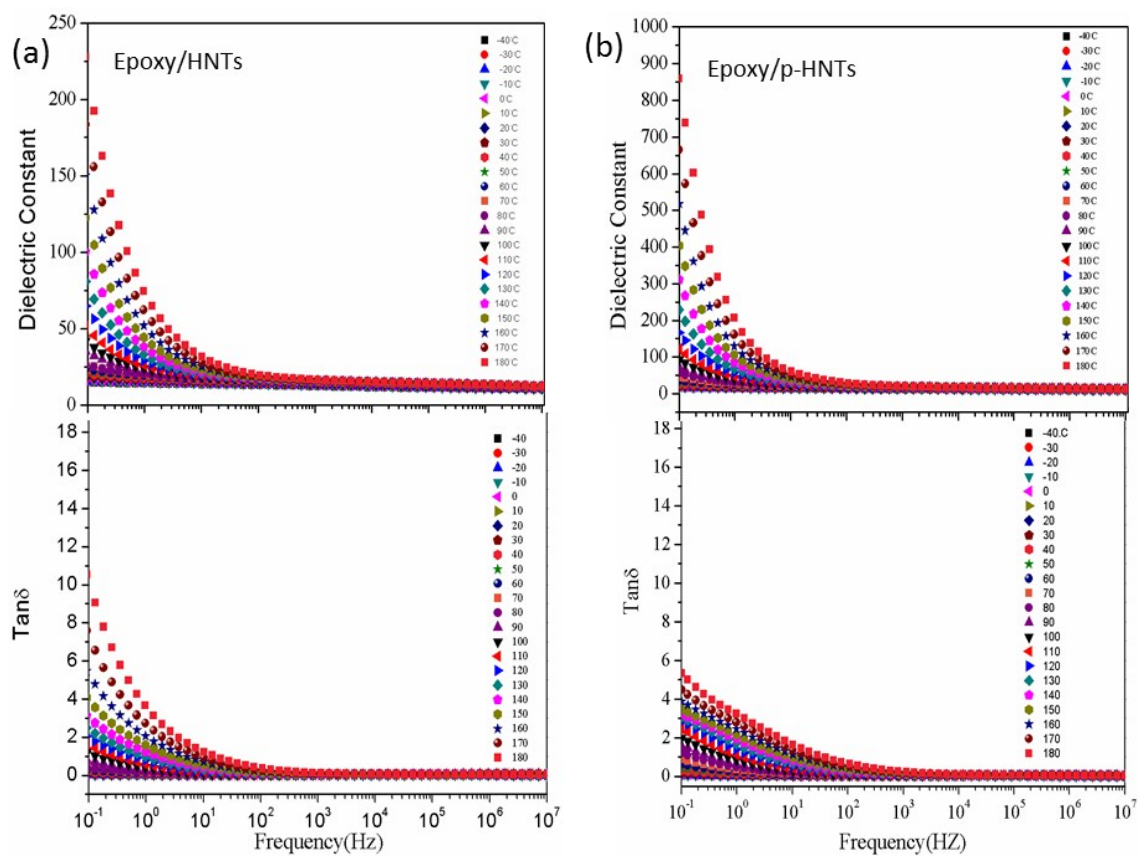

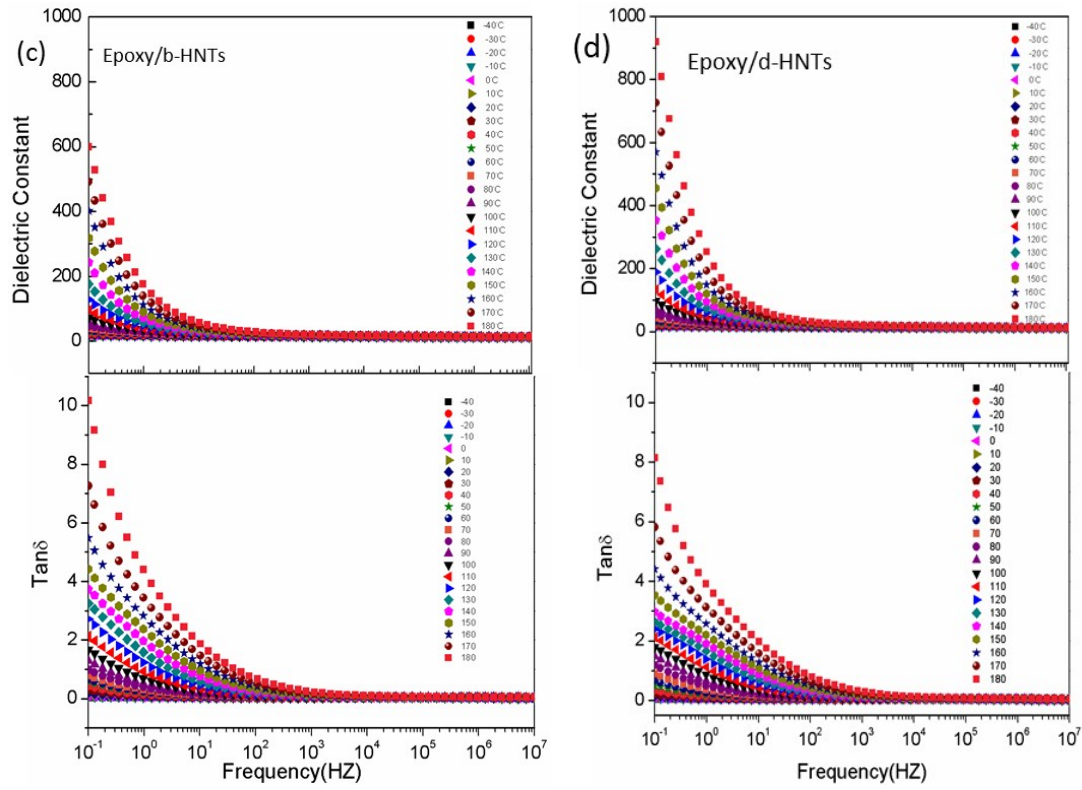

Fig.S4 Dielectric properties of epoxy nanodielectrics: (a) HNTs; (b) p-HNTs; (c) b-HNTs and (d) d-HNTs, under the temperature from -40 °C to 180 °C .

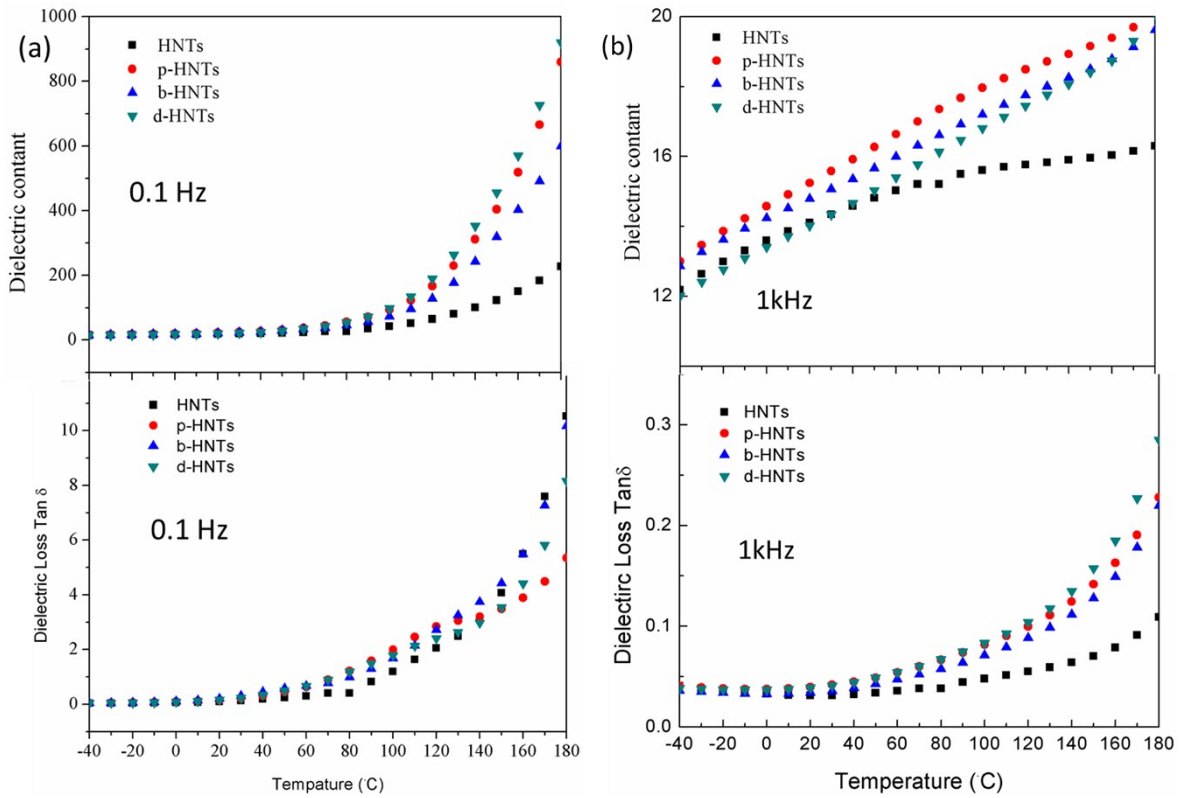

Fig. S5 Temperature dependent of dielectric properties of epoxy nanodielectrics: (a) 0.1 Hz and (b)

1 kHz.

## Reference

1. K. P. Menard, *Dynamic Mechanical Analysis: A Practical Introduction*, CRC, Boca Raton, 1999.
